# Supplementary material
Source: PubMed Central journal article supplement (PMC6709527)
Supplement: NIHMS1041310-supplement-Supp_Tables_and_Figures.pdf [file NIHMS1041310-supplement-Supp_Tables_and_Figures.pdf]

In the format provided by the authors and unedited.

# Biallelic expansion of an intronic repeat in *RFC1* is a common cause of late-onset ataxia

Andrea Cortese<sup>1\*</sup>, Roberto Simone<sup>2</sup>, Roisin Sullivan<sup>1,11</sup>, Jana Vandrovцова<sup>1,11</sup>, Huma Tariq<sup>1</sup>, Wai Yan Yau<sup>1</sup>, Jack Humphrey<sup>1</sup>, Zane Jaunmuktane<sup>2</sup>, Prasanth Sivakumar<sup>1</sup>, James Polke<sup>3</sup>, Muhammad Ilyas<sup>4</sup>, Eloise Tribollet<sup>1</sup>, Pedro J. Tomaselli<sup>5</sup>, Grazia Devigili<sup>6</sup>, Ilaria Callegari<sup>7</sup>, Maurizio Versino<sup>7,8</sup>, Vincenzo Salpietro<sup>1</sup>, Stephanie Efthymiou<sup>1</sup>, Diego Kaski<sup>1</sup>, Nick W. Wood<sup>1</sup>, Nadja S. Andrade<sup>9</sup>, Elena Buglo<sup>10</sup>, Adriana Rebelo<sup>10</sup>, Alexander M. Rossor<sup>1</sup>, Adolfo Bronstein<sup>2</sup>, Pietro Fratta<sup>1</sup>, Wilson J. Marques<sup>5</sup>, Stephan Züchner<sup>10</sup>, Mary M. Reilly<sup>1,12</sup> and Henry Houlden<sup>1,3,12\*</sup>

<sup>1</sup>Department of Neuromuscular Disease, UCL Queen Square Institute of Neurology and The National Hospital for Neurology and Neurosurgery, London, UK. <sup>2</sup>Department of Clinical and Movement Neurosciences, UCL Queen Square Institute of Neurology and The National Hospital for Neurology and Neurosurgery, London, UK. <sup>3</sup>Neurogenetics Laboratory, UCL Queen Square Institute of Neurology and The National Hospital for Neurology and Neurosurgery, London, UK. <sup>4</sup>Department of Biological Sciences, International Islamic University, Islamabad, Pakistan. <sup>5</sup>Department of Neurology, School of Medicine at Ribeirão Preto, University of São Paulo, Ribeirão Preto, Brazil. <sup>6</sup>UO Neurologia I, Fondazione IRCCS Istituto Neurologico 'Carlo Besta', Milan, Italy. <sup>7</sup>IRCCS Mondino Foundation, Pavia, Italy. <sup>8</sup>Department of Brain and Behavioral Sciences, University of Pavia, Pavia, Italy. <sup>9</sup>Department of Psychiatry and Behavioural Sciences, Center for Therapeutic Innovation, University of Miami Miller School of Medicine, Miami, FL, USA. <sup>10</sup>Dr. John T. Macdonald Foundation Department of Human Genetics and John P. Hussman Institute for Human Genomics, University of Miami Miller School of Medicine, Miami, FL, USA. <sup>11</sup>These authors contributed equally: Roisin Sullivan, Jana Vandrovцова. <sup>12</sup>These authors jointly supervised this project: Mary M. Reilly, Henry Houlden. \*e-mail: [andrea.cortese@ucl.ac.uk](mailto:andrea.cortese@ucl.ac.uk); [h.houlden@ucl.ac.uk](mailto:h.houlden@ucl.ac.uk)

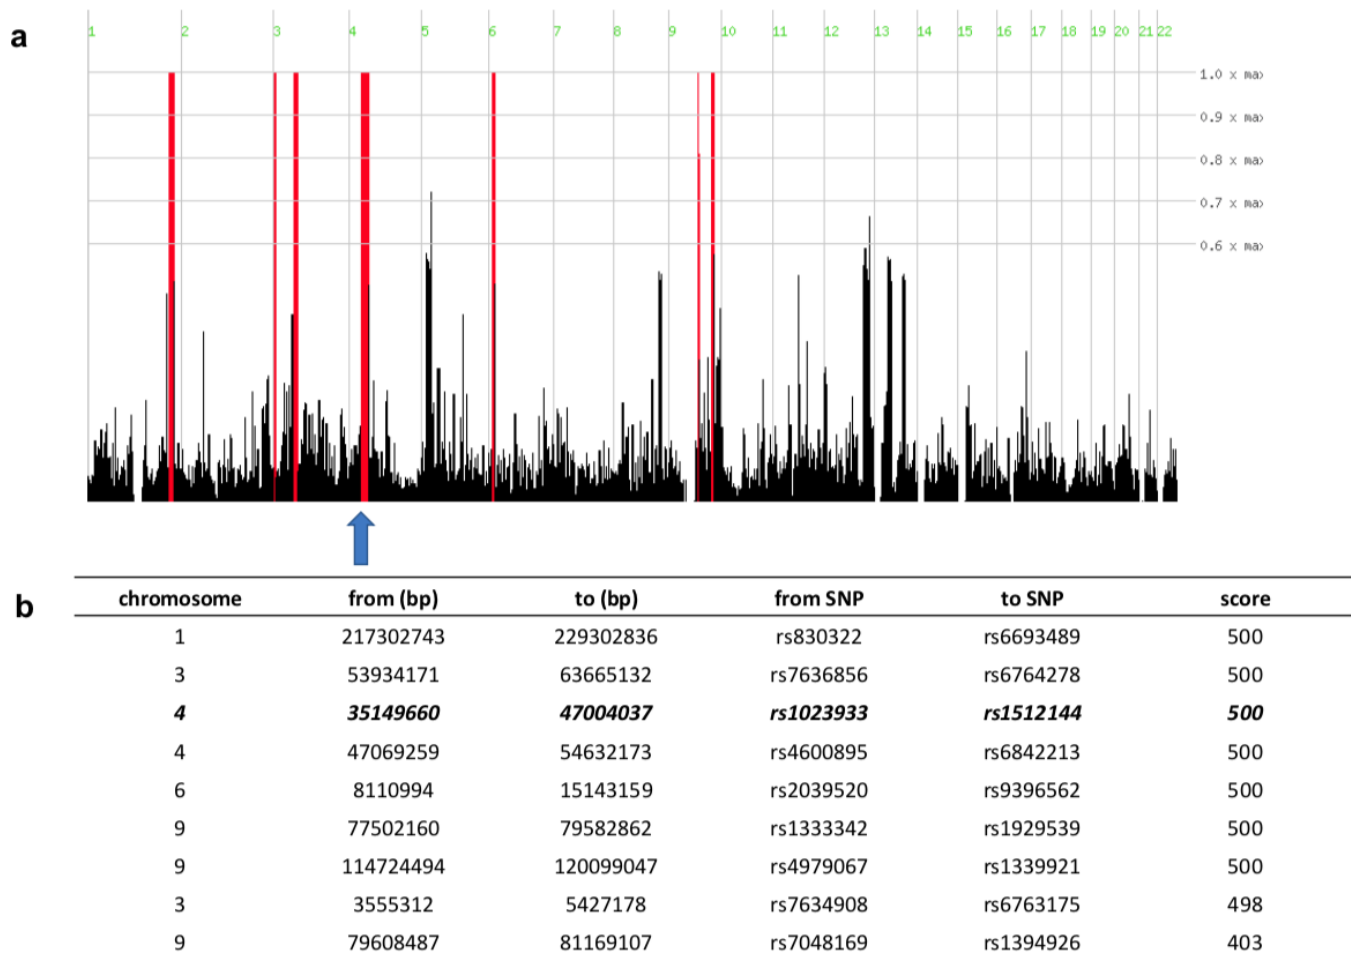

## Supplementary Figure 1

### Homozygosity mapping in a consanguineous CANVAS family

(a,b) Homozygosity mapping plot (a) and genomic positions (b) defining the homozygous regions shared by Fam7-1 and Fam7-2. The blue arrow in a points to a ~12-Mb homozygous region on chromosome 4 (bold highlighted in b), which encompass the AAGGG repeat expansion locus.

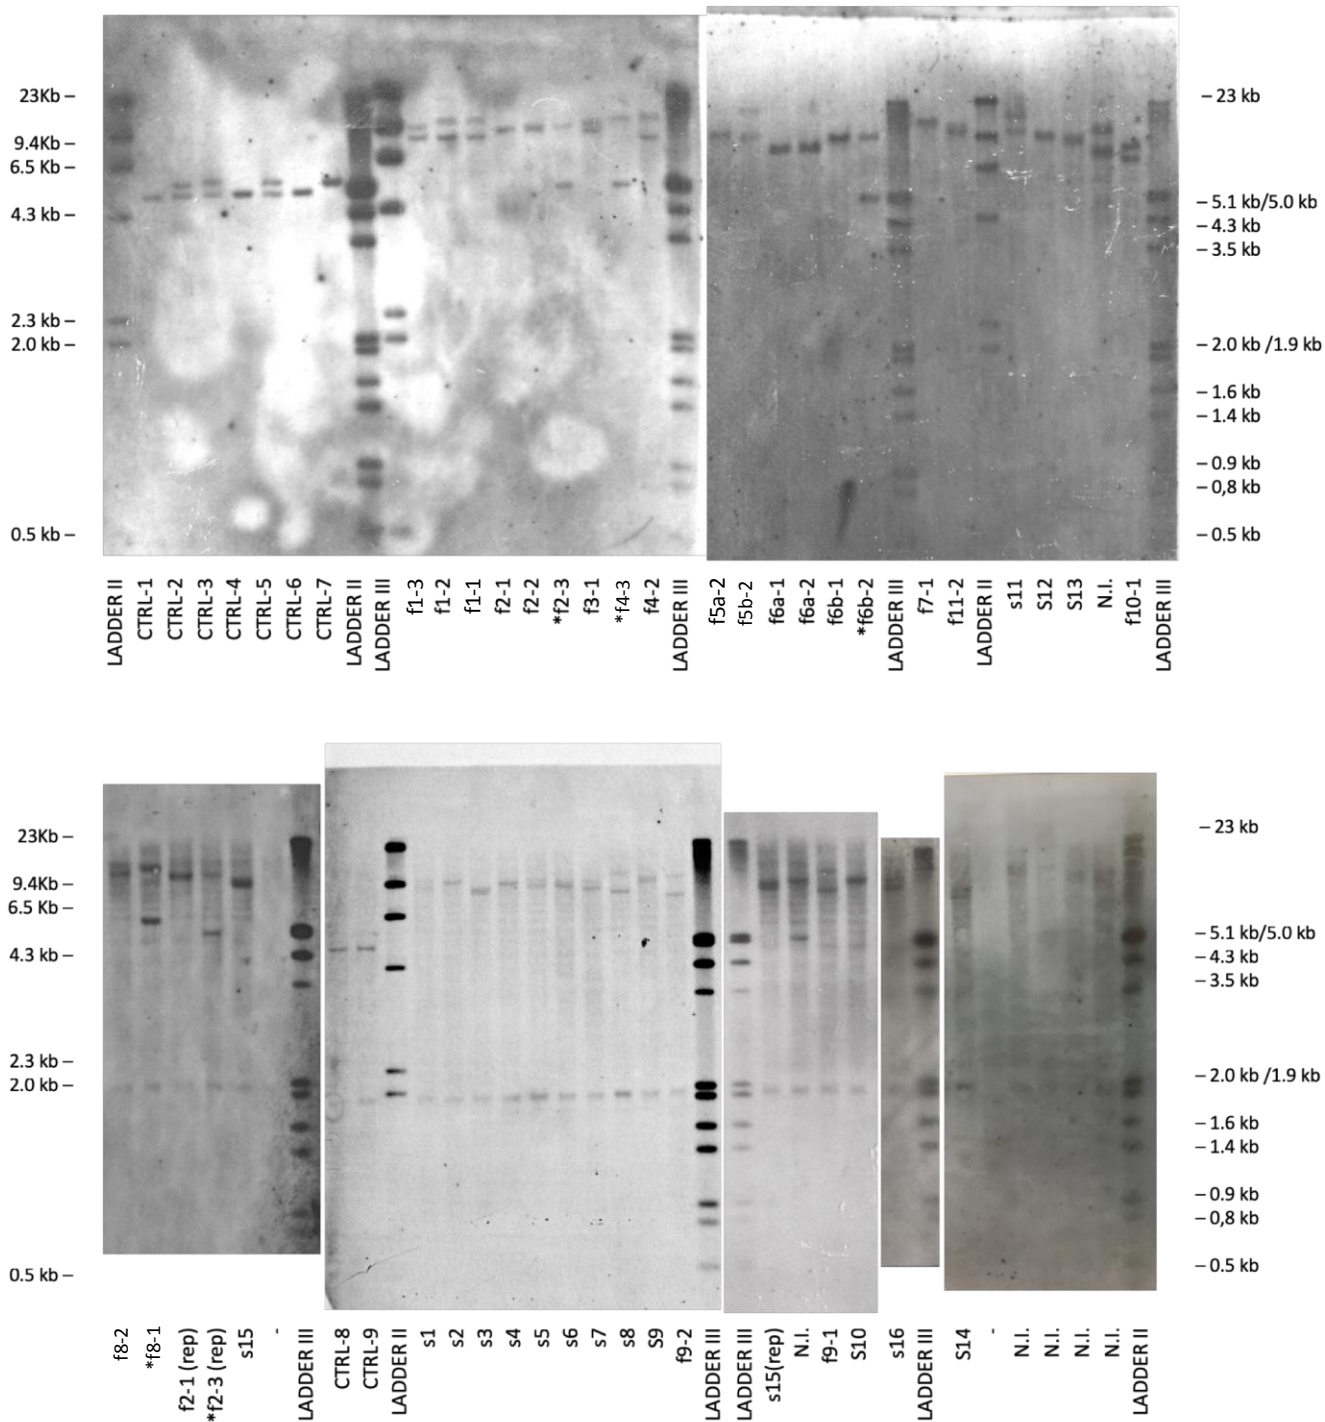

**Supplementary Figure 2**

**Southern blots**

Southern blotting of genomic DNA from 18 patients from 11 families and 16 sporadic cases. Patients show two discrete or overlapping bands of 7 to 15 kb. Unaffected siblings, indicated by “\*”, carry an expanded allele and one allele in the normal range. In controls (CTRL), one 5-kb band corresponding to the expected size for reference allele (AAAAG)<sub>11</sub> is usually observed, but bands

of increased size can also be seen. In some blots, an unspecific band at 2 kb is also observed. Ladder used are DIG-labelled DNA Molecular Weight Marker II (Roche) (LADDER II, left) containing 8 fragments with the following base pair lengths: 125 (not shown), 564, 2,027, 2,322, 4,361, 6,557, 9,416, and 23,130 bp and DIG-labelled DNA Molecular Weight Marker III (Roche) (LADDER III, right) containing 13 fragments with the following base pair lengths: 125 (not shown), 564, 831, 947, 1,375, 1,584, 1,904, 2,027, 3,530, 4,268, 4,973, 5,148, and 21,226 bp. N.I., sample not included in this study; rep, repeated sample.

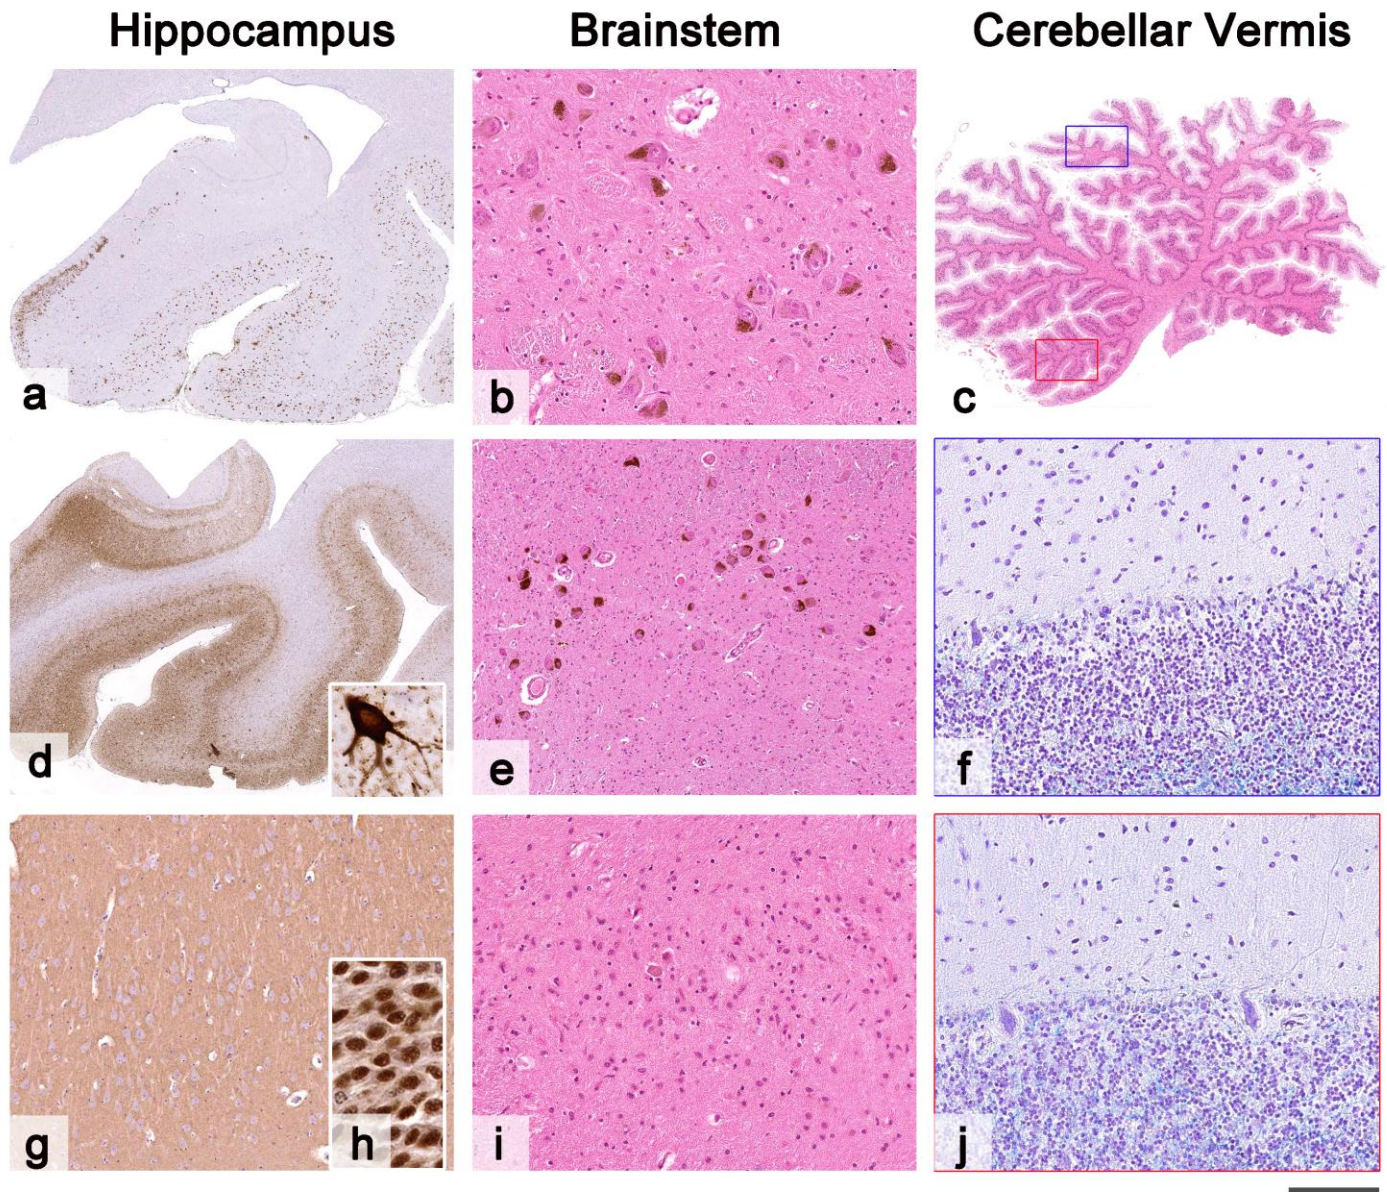

**Supplementary Figure 3**

**Morphological findings in the brain from patient with CANVAS**

(a) Histological examination reveals some age-related changes in the medial temporal lobe with frequent diffuse parenchymal amyloid- $\beta$  deposits (a) in the neocortex, subiculum, CA1 and caudate nucleus (Thal phase 3). Rare leptomenigeal amyloid angiopathy (not shown) is also seen in the cerebral hemisphere. Neurofibrillary tangle tau pathology (d) is restricted to the medial temporal lobe with the extent corresponding to Braak and Braak stage IV. There are no  $\alpha$ -synuclein (g) or TDP43 (h) positive pathological inclusions in the medial temporal lobe. (b) In the brainstem, the locus coeruleus (b) and pontine base nuclei, and white matter tracts show no apparent neuronal loss. In the midbrain, the *substantia nigra* shows no significant reduction of pigmented neurones (e). In the inferior olivary nucleus, however, there is widespread depletion of neurones and marked chronic gliosis (i). (c) In the cerebellar hemisphere and cerebellar vermis, haematoxylin and eosin stained section shows prominent cortical atrophy with more prominent atrophy seen in the superior cerebellar vermis (c and f, blue square) when compared with the inferior cerebellar vermis (c and j, red square). There are no p62 positive pathological inclusions (f and j) in the cerebellum. Scale bar: 3 mm in a and d; 200  $\mu$ m in g and e; 40  $\mu$ m in h; 100  $\mu$ m in b, i, f and j; 35 mm in c. Stainings were carried out once on patients' samples with appropriate controls according to standard practice and histopathology procedures in an ISO15189 accredited laboratory.

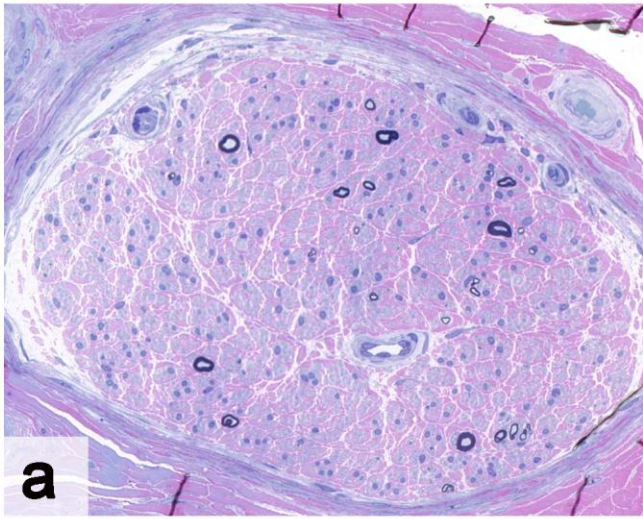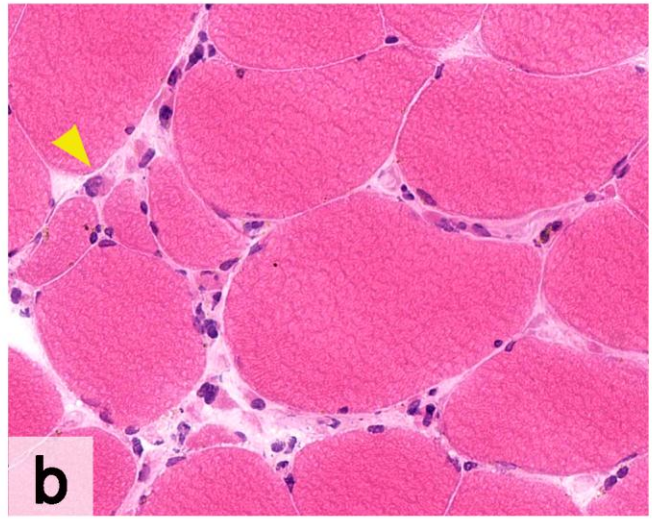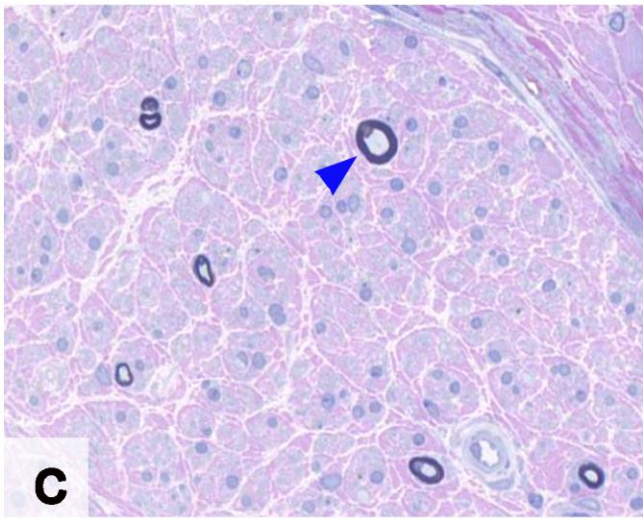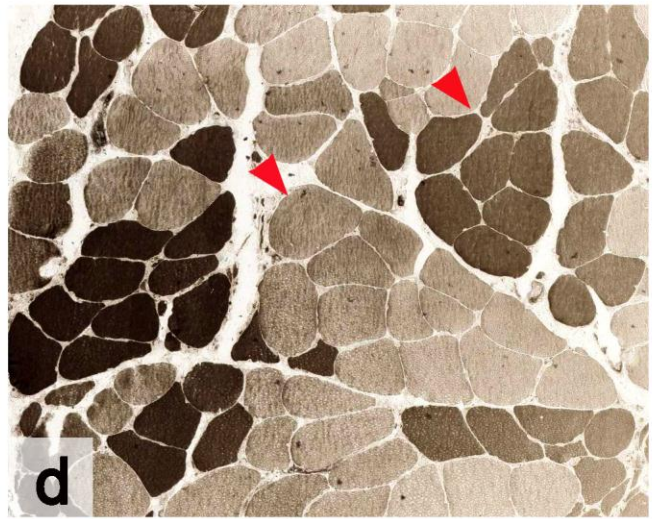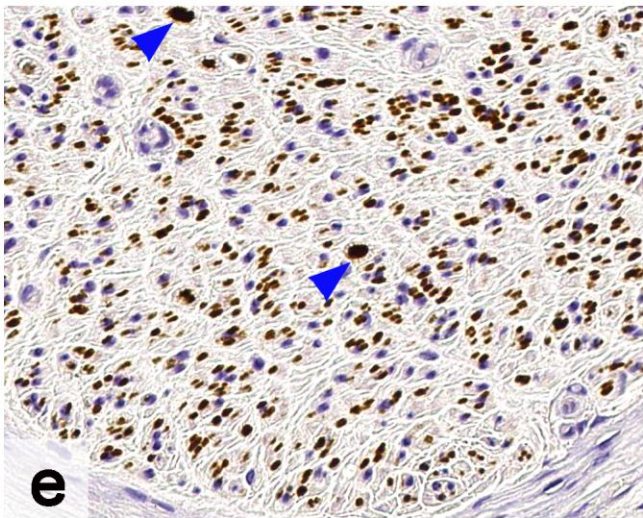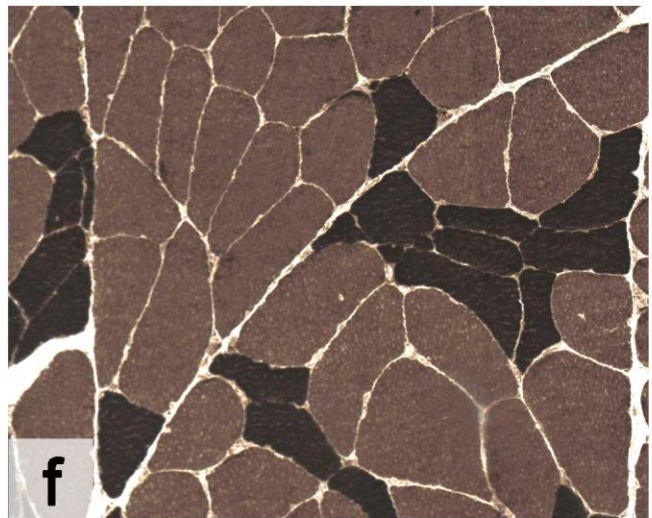

Supplementary Figure 4

### **Morphological findings in the nerve and muscle biopsy from a representative patient with CANVAS**

Sural nerve biopsy (**a**, **c**, and **e**). **a** and **c**, semi-thin resin section stained with methylene blue azure-basic fuchsin; **e**, immunostaining for neurofilament with SMI31. Quadriceps skeletal muscle biopsy (**b**, **d** and **f**). **b**, stained with haematoxylin and eosin; **d** and **f**, histochemical staining with ATP 4.2 (**d**) and ATP9.4 (**f**). The nerve biopsy demonstrates marked loss of large and small myelinated fibres (**a**, **c**, and **e**, blue arrowheads) with no active axonal degeneration or any signs of regeneration. The unmyelinated fibres (**e**) are comparably better preserved. The skeletal muscle biopsy reveals angulated fibres and particularly small atrophic fibres (**b**, yellow arrowhead). There is grouping of type 1 and type 2 fibres (**d** red arrows and **f**), in keeping with chronic denervation with reinnervation. Scale bar: 100  $\mu$ m in **a**, **d** and **f**; 50  $\mu$ m in **c**, **e** and **b**. Stainings were carried out once on patients' samples with appropriate controls according to standard practice and histopathology procedures in an ISO15189 accredited laboratory.

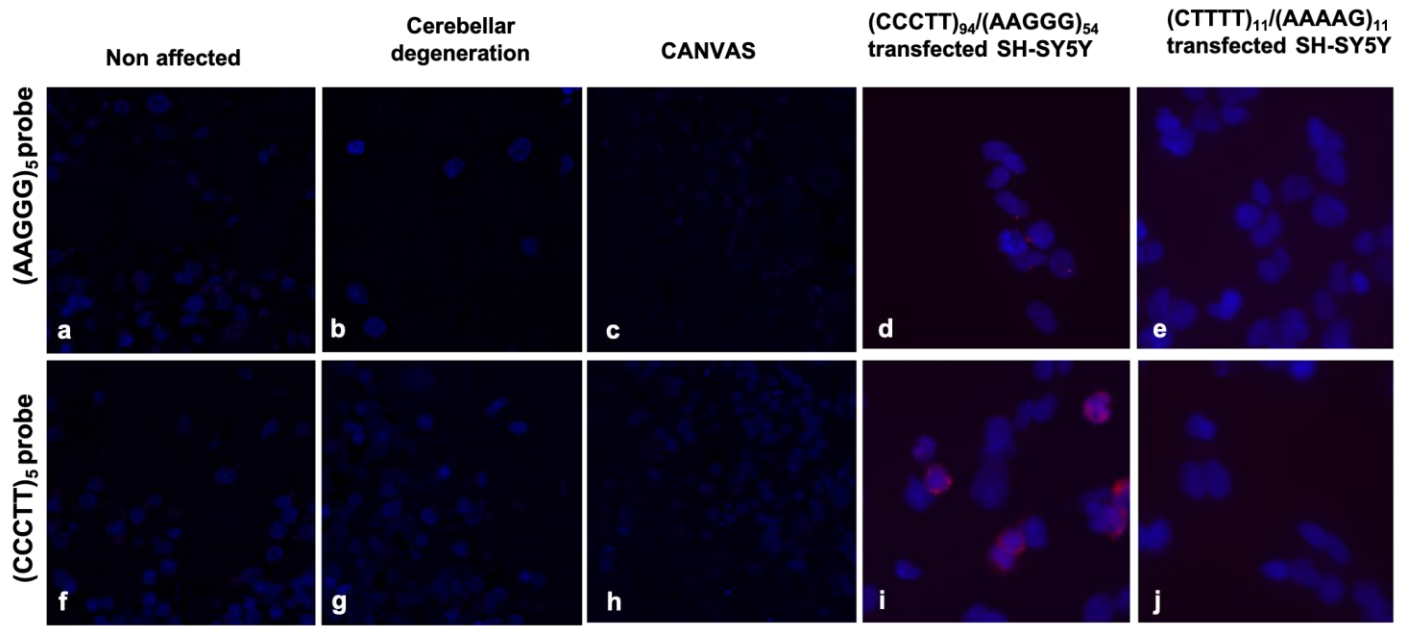

### Supplementary Figure 5

#### RNA fluorescence *in situ* hybridization (FISH)

(a-e) No endogenous RNA foci were detected using oligonucleotides (AAGGG)<sub>5</sub> (a, b, c, d, e) or (TTCCC)<sub>5</sub> (f, g, h, i, j) probes targeting transcripts containing sense (TTCCC) or antisense (GGGAA) repeated units in unaffected individuals (a, f), pathological controls (b, g), or CANVAS patient (c, h). As a technical control, SH-SY5Y cells were transfected with plasmids expressing mutant sense (TTCCC)<sub>94</sub> (d), mutant anti-sense (AAGGG)<sub>54</sub> (i), wild-type sense (TTTTT)<sub>11</sub> (e) or wild-type anti-sense (AAAAG)<sub>11</sub> (j) and analyzed 24 h after transfection by RNA FISH. RNA foci were detected in d and i (red). Nuclei were stained with DAPI (blue). Scale bar: 20 μm in a, b, c, f, g, h; 10 μm in d, e, i, j. Experiments were repeated independently twice with similar results.



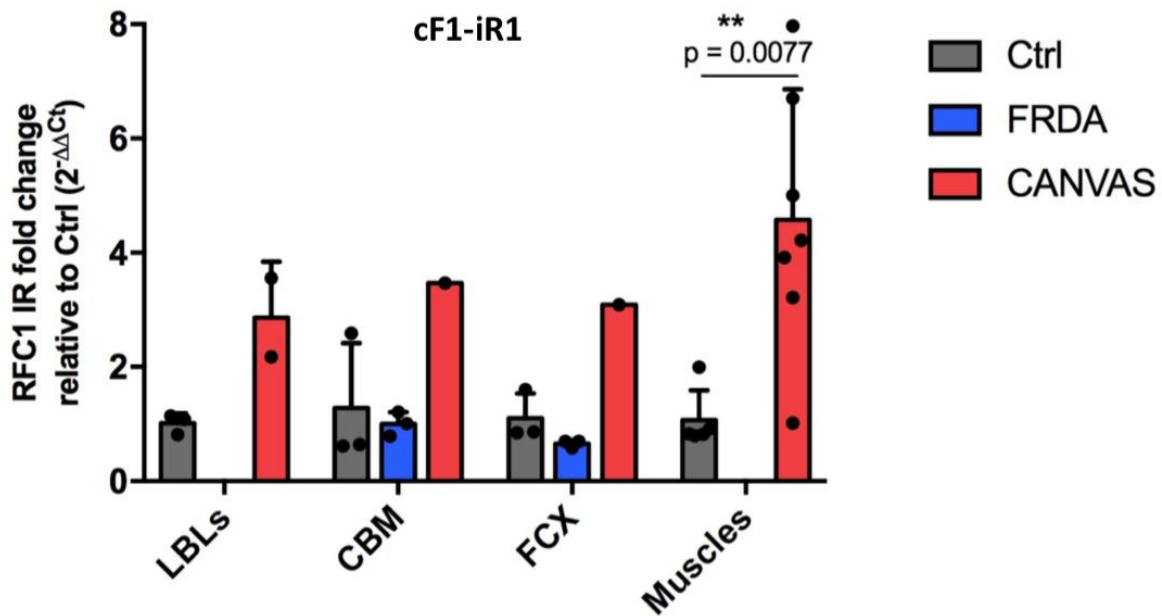

Supplementary Figure 6

***RFC1* intron 2 retention in multiple tissue types in CANVAS**

Expression levels of intron 2 in *RFC1* pre-mRNA as measured by qRT-PCR using primers cF1-iR1 in control ( $n = 3$ ) and CANVAS ( $n = 2$ ) lymphoblasts; control ( $n = 3$ ), Friedreich's ataxia ( $n = 3$ ) and CANVAS ( $n = 1$ ) cerebellum and frontal cortex; control ( $n = 5$ ) and CANVAS muscles ( $n = 7$ ). Bar graphs show mean  $\pm$  s.d. and data distribution (black dots). Two-tailed  $t$ -test was performed to compare the expression level of intron 2 in *RFC1* pre-mRNA in patients versus healthy or disease controls. All experiments were repeated independently twice with similar results. CANVAS, cerebellar ataxia, neuropathy, vestibular areflexia syndrome; CBM, cerebellum; Ctrl, control; FCX, frontal cortex; FRDA, Friedreich's ataxia; IR, intron 2 retention; LBLs, lymphoblasts.

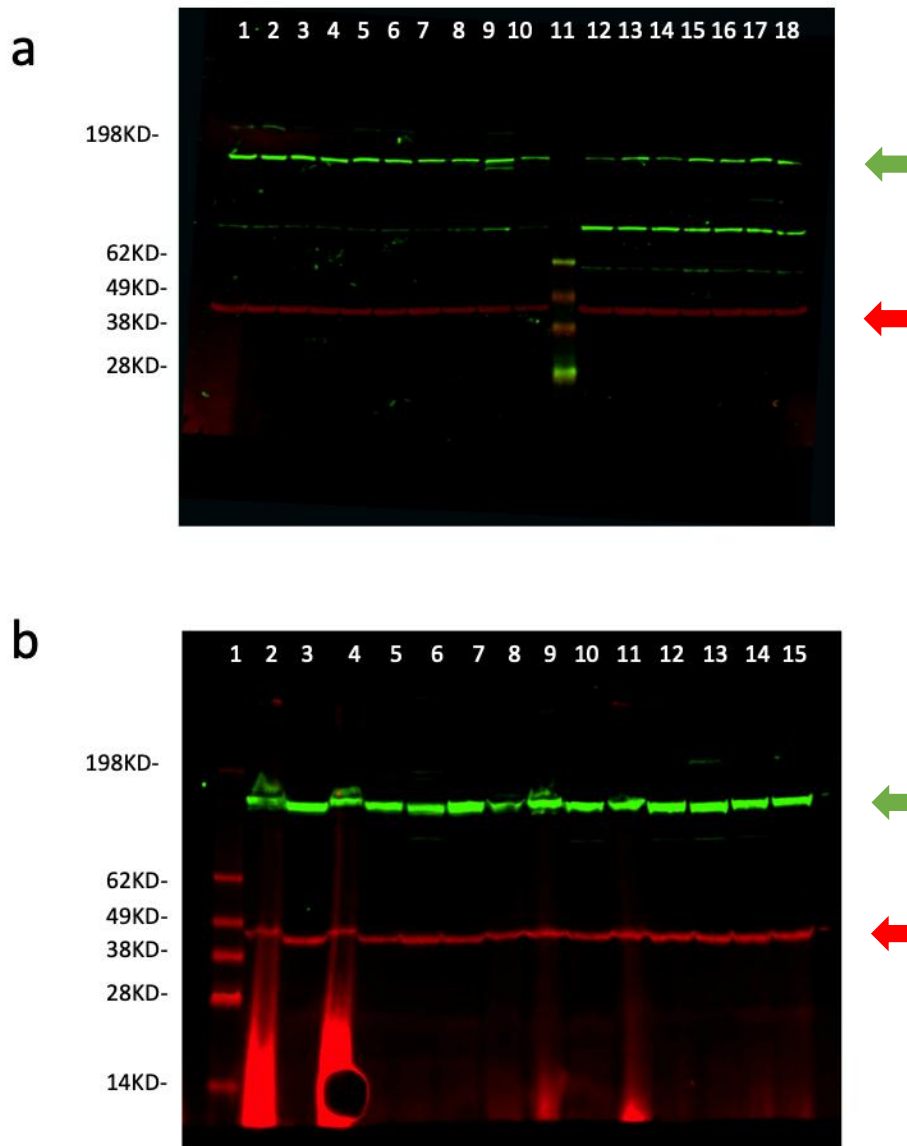

## Supplementary Figure 7

### Western blots for *RFC1*-encoded protein expression

(a,b) Uncropped gels showing *RFC1*-encoded protein levels as measured by Western blotting using the polyclonal antibody (GTX129291) and normalized to  $\beta$ -actin in (a) control ( $n = 5$ , lanes 1-5) and CANVAS ( $n = 5$ , lanes 6-10) fibroblasts, control ( $n = 3$ , lanes 12-14) and CANVAS ( $n = 4$ , lanes 15-18) lymphoblasts and (b) CANVAS ( $n = 1$ , lane 2), control ( $n = 3$ , lanes 3-5), Friedreich's ataxia ( $n = 3$ , lanes 6-8) vermis and CANVAS ( $n = 1$ , lane 9), control ( $n = 3$ , lanes 10-12) and Friedreich's ataxia ( $n = 3$ , lanes 13-15) frontal cortex. Green arrow indicates the expected 128 kDa band corresponding to *RFC1*-encoded protein, and the red arrow a 45 kDa band of  $\beta$ -actin. Ladder in lanes 11 (a) and 1 (b) is SeeBlue Plus2 (ThermoFisher).

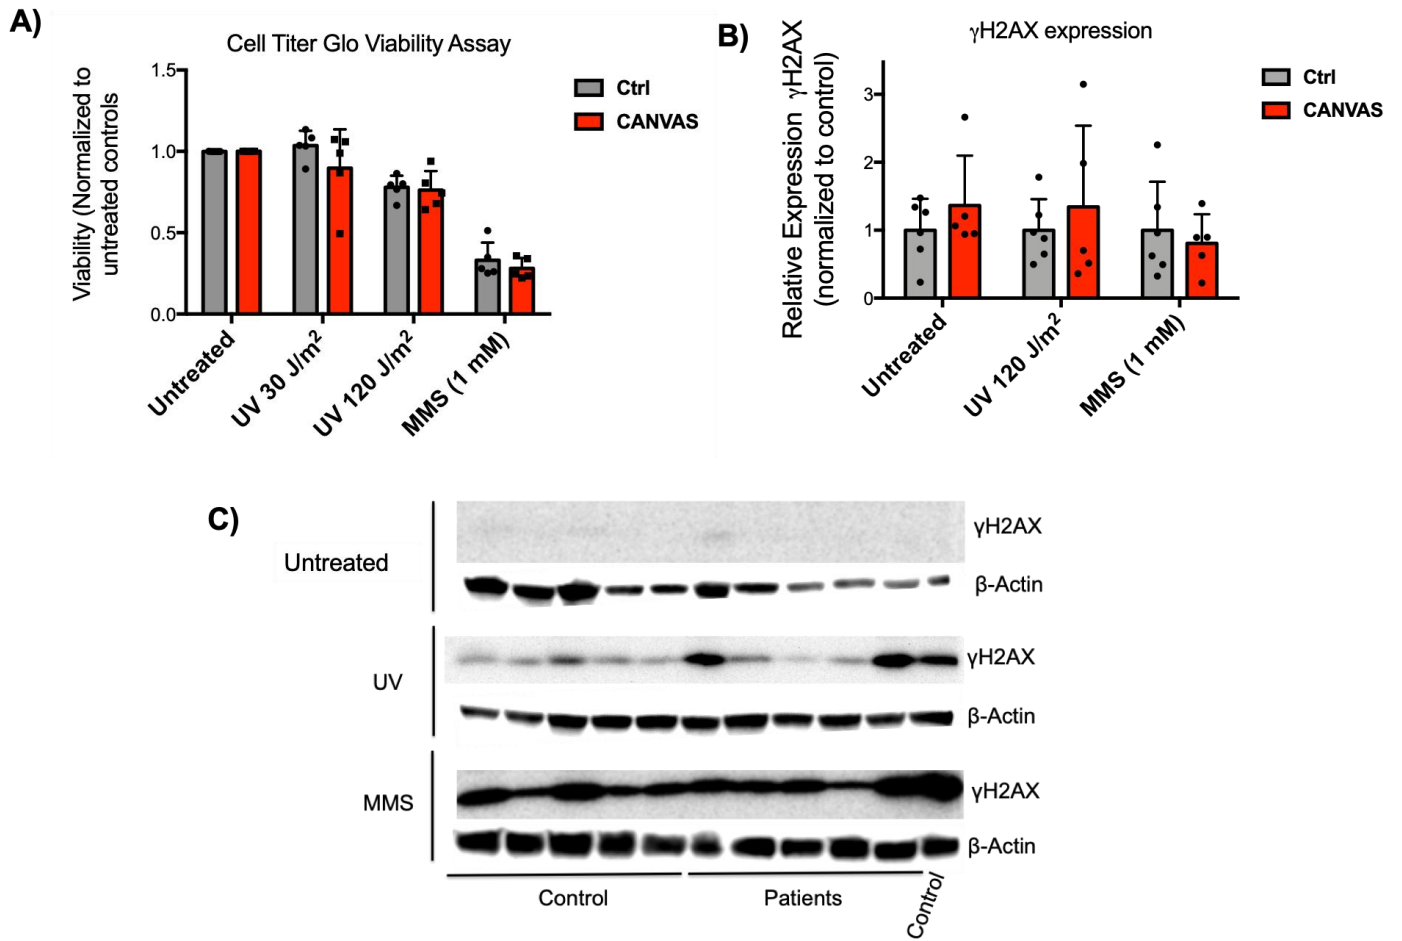

### Supplementary Figure 8

#### Response to DNA damage in CANVAS

(a) Cell viability after DNA damage inducing treatments of CANVAS ( $n = 5$ ) and control ( $n = 5$ ) fibroblasts. (b) Quantification of  $\gamma$ H2AX protein expression levels normalized to actin and plotted relative to controls. (c) Representative western blot of cells treated with different DNA damage inducing agents. Bar graphs show mean  $\pm$  s.d. and data distribution (dots). All experiments were repeated independently twice with similar results.

**SUPPLEMENTARY TABLE 1. List of known HUGO Gene Nomenclature Committee (HGNC) genes present in the 1.7Mb region between markers rs6814637 and rs10008483 (chr4:38977921-40712231)**

TMEM156  
KLHL5  
WDR19  
RFC1  
KLB  
RPL9  
LIAS  
LOC401127  
UGDH  
UGDH-AS1  
SMIM14  
BC040333  
UBE2K  
PDS5A  
LOC344967  
N4BP2  
RHOH  
JN120858  
CHRNA9  
RBM47  
MIR4802

**SUPPLEMENTAL TABLE 2. Clinical features of patients with CANVAS and late-onset ataxia carrying the recessive AAGGG repeat expansion in *RFC1***

| <b>N</b> | <b>ID</b> | <b>gender</b> | <b>Age of onset</b> | <b>Age at examination</b> | <b>Symptom at onset</b>                                                                   | <b>peripheral neuropathy</b> | <b>cerebellar dysfunction</b> | <b>bilateral vestibular areflexia</b> | <b>autonomic dysfunction</b>           | <b>cough</b> | <b>SAPs UL</b> | <b>SAPs LL</b> | <b>CMAPs</b>                            | <b>cerebellar atrophy</b> | <b>number of repeats (smaller, larger allele)</b> |
|----------|-----------|---------------|---------------------|---------------------------|-------------------------------------------------------------------------------------------|------------------------------|-------------------------------|---------------------------------------|----------------------------------------|--------------|----------------|----------------|-----------------------------------------|---------------------------|---------------------------------------------------|
| 1        | Fam 1-1   | male          | 49                  | 69                        | unsteadiness                                                                              | yes                          | yes                           | yes                                   | no                                     | no           | absent         | absent         | normal                                  | yes                       | 880,1480                                          |
| 2        | Fam 1-2   | male          | 50                  | 65                        | unsteadiness, pain<br>unsteadiness in<br>the dark, numb<br>feet, pain                     | yes                          | yes                           | yes                                   | no                                     | no           | absent         | absent         | normal                                  | NA                        | 880,1480                                          |
| 3        | Fam 1-3   | male          | 48                  | 63                        | unsteadiness                                                                              | yes                          | yes                           | yes                                   | no                                     | no           | absent         | absent         | normal                                  | no                        | 880,1280                                          |
| 4        | Fam 2-1   | male          | 60                  | 78                        | unsteadiness                                                                              | yes                          | yes                           | no                                    | no                                     | yes          | NA             | NA             | NA                                      | NA                        | 1200,1200                                         |
| 5        | Fam 2-2   | female        | 58                  | 69                        | unsteadiness<br>Unsteadiness,<br>pain                                                     | yes                          | yes                           | yes                                   | Yes (urinary urgency<br>and retention) | yes          | absent         | absent         | normal<br>reduced in the<br>lower limbs | yes                       | 1200,1200                                         |
| 6        | Fam 3-1   | male          | 55                  | 80                        | unsteadiness                                                                              | yes                          | yes                           | yes                                   | no                                     | no           | absent         | absent         | normal                                  | yes                       | NA                                                |
| 7        | Fam 3-2   | female        | 55                  | 78                        | unsteadiness                                                                              | yes                          | yes                           | yes                                   | no                                     | no           | absent         | absent         | normal<br>reduced in the<br>lower limbs | yes                       | 1080,1480                                         |
| 8        | Fam 4-2   | male          | 66                  | 77                        | unsteadiness<br>unsteadiness,<br>numb feet                                                | yes                          | yes                           | yes                                   | Yes (fecal<br>incontinence)            | no           | absent         | absent         | normal                                  | NA                        | 880,1800                                          |
| 9        | Fam 5a-1  | male          | 59                  | 65                        | unsteadiness                                                                              | yes                          | yes                           | yes                                   | no                                     | no           | absent         | absent         | normal                                  | yes                       | NA                                                |
| 10       | Fam 5a-2  | female        | 53                  | 54                        | unsteadiness,<br>numb feet                                                                | yes                          | no                            | no                                    | no                                     | no           | NA             | NA             | NA                                      | no                        | 1000,1000                                         |
| 11       | Fam 5b-2  | male          | 60                  | 62                        | unsteadiness, falls                                                                       | yes                          | yes                           | yes                                   | no                                     | no           | absent         | absent         | normal                                  | yes                       | 1000,2000                                         |
| 12       | Fam 6a-1  | female        | 67                  | 77                        | unsteadiness in<br>the dark, pain<br>numb hands, later<br>unsteadiness and<br>oscillopsia | yes                          | yes                           | yes                                   | no                                     | no           | reduced        | absent         | normal                                  | yes                       | 600,700                                           |
| 13       | Fam 6a-2  | female        | 69                  | 74                        | Dizziness. Later<br>unsteadiness and<br>falls                                             | yes                          | yes                           | yes                                   | no                                     | yes          | absent         | absent         | normal                                  | yes                       | 600,700                                           |
| 14       | Fam 6b-1  | male          | 40                  | 70                        | Dizziness. Later<br>unsteadiness and<br>falls                                             | yes                          | yes                           | yes                                   | no                                     | no           | absent         | absent         | normal                                  | yes                       | 880,880                                           |
| 15       | Fam 7-1   | female        | 45                  | 50                        | unsteadiness                                                                              | yes                          | yes                           | yes                                   | no                                     | no           | reduced        | reduced        | normal                                  | yes                       | 1200,1200                                         |
| 16       | Fam 7-2   | male          | 43                  | 48                        | unsteadiness                                                                              | yes                          | yes                           | yes                                   | no                                     | no           | reduced        | reduced        | normal                                  | yes                       | NA                                                |
| 17       | Fam 8-2   | female        | NA                  | 58                        | unsteadiness                                                                              | yes                          | yes                           | no                                    | no                                     | no           | absent         | absent         | normal                                  | yes                       | NA                                                |
| 18       | Fam 8-3   | female        | NA                  | 52                        | unsteadiness<br>unsteadiness in<br>the dark, numb<br>hands                                | yes                          | yes                           | no                                    | Yes (abnormal pupil<br>reactivity)     | no           | absent         | absent         | normal                                  | yes                       | 1400,1800                                         |
| 19       | Fam 9-1   | male          | 45                  | 68                        | unsteadiness                                                                              | yes                          | no                            | yes                                   | Yes (erectile<br>dysfunction)          | yes          | absent         | reduced        | normal                                  | NA                        | 880,1480                                          |
| 20       | Fam 9-2   | female        | 45                  | 64                        | Numb feet                                                                                 | yes                          | no                            | yes                                   | no                                     | yes          | reduced        | reduced        | normal                                  | no                        | 600,1200                                          |
| 21       | Fam 10-2  | female        | 55                  | 57                        | unsteadiness                                                                              | yes                          | no                            | no                                    | no                                     | no           | reduced        | reduced        | normal                                  | NA                        | 400,800                                           |
| 22       | Fam 10-1  | male          | 50                  | 57                        | unsteadiness                                                                              | yes                          | no                            | no                                    | no                                     | yes          | reduced        | absent         | normal                                  | NA                        | NA                                                |
| 23       | Fam 11-2  | female        | 45                  | 64                        | unsteadiness                                                                              | yes                          | yes                           | yes                                   | no                                     | yes          | absent         | absent         | normal                                  | yes                       | 880,1100                                          |
| 24       | s1        | male          | 65                  | 72                        | unsteadiness                                                                              | yes                          | yes                           | no                                    | Yes (erectile<br>dysfunction)          | yes          | absent         | absent         | normal                                  | yes                       | 800,1000                                          |

|    |     |        |    |    |                                                         |     |     |     |                                                                                            |     |         |         |                                                                                     |     |           |
|----|-----|--------|----|----|---------------------------------------------------------|-----|-----|-----|--------------------------------------------------------------------------------------------|-----|---------|---------|-------------------------------------------------------------------------------------|-----|-----------|
| 25 | s2  | female | 48 | 65 | unsteadiness,<br>numb hands                             | yes | yes | no  | Yes (constipation,<br>urinary incontinence,<br>impaired regulation of<br>blood pressure)   | yes | reduced | absent  | normal                                                                              | yes | 1000,1000 |
| 26 | s3  | male   | 45 | 62 | unsteadiness in<br>the dark, numb<br>feet               | yes | no  | yes | no                                                                                         | yes | absent  | absent  | reduced in the<br>lower limbs<br>patchy<br>reduction of<br>conduction<br>velocities | NA  | 700,700   |
| 27 | s4  | female | 62 | 72 | unsteadiness,<br>numb feet                              | yes | yes | no  | Yes (urinary retention)                                                                    | yes | absent  | absent  | normal                                                                              | yes | 880,880   |
| 28 | s5  | female | 54 | 74 | unsteadiness, pain                                      | yes | no  | no  | Yes (urinary urgency)                                                                      | yes | reduced | absent  | normal                                                                              | yes | 880,1000  |
| 29 | s6  | male   | 49 | 55 | unsteadiness,<br>numbness                               | yes | no  | no  | Yes (constipation)                                                                         | no  | reduced | absent  | normal<br>reduced in the<br>lower limbs                                             | yes | 880,1000  |
| 30 | s7  | female | 48 | 62 | numb hands                                              | yes | no  | yes | no                                                                                         | yes | absent  | absent  | normal                                                                              | yes | 800,1000  |
| 31 | s8  | female | 60 | 82 | numb feet                                               | yes | yes | yes | no                                                                                         | no  | absent  | absent  | normal                                                                              | no  | 700,1300  |
| 32 | s9  | male   | 59 | 74 | unsteadiness                                            | yes | yes | yes | no                                                                                         | yes | absent  | absent  | normal<br>reduced in the<br>lower limbs                                             | yes | 1000,1100 |
| 33 | s10 | male   | 69 | 72 | unsteadiness<br>numb feet,<br>dysesthesia               | yes | yes | yes | no                                                                                         | yes | absent  | absent  | normal                                                                              | yes | 1150/1150 |
| 34 | s11 | male   | 45 | 55 | NA                                                      | yes | no  | no  | no                                                                                         | no  | NA      | NA      | NA                                                                                  | NA  | 1100,1800 |
| 35 | s12 | male   | NA | NA | NA                                                      | yes | yes | yes | no                                                                                         | no  | absent  | absent  | normal                                                                              | yes | 1000,1000 |
| 36 | s13 | female | 45 | 65 | numbness                                                | yes | yes | no  | Yes (urinary<br>dysfunction)<br>Yes (urinary urgency,<br>gastro-intestinal<br>dysmotility) | no  | absent  | absent  | normal                                                                              | no  | 800,900   |
| 37 | s14 | female | 65 | 76 | unsteadiness in<br>the dark, pain                       | yes | yes | no  | no                                                                                         | yes | absent  | absent  | normal                                                                              | yes | 900,1200  |
| 38 | s15 | male   | 65 | 71 | unsteadiness in<br>the dark                             | yes | yes | yes | no                                                                                         | no  | absent  | absent  | normal                                                                              | no  | 1100,1100 |
| 39 | s16 | female | 69 | 73 | unsteadiness,<br>vertigo                                | yes | yes | yes | no                                                                                         | yes | absent  | absent  | normal                                                                              | yes | 880, 1100 |
| 40 | s17 | male   | 55 | 63 | Unsteadiness,<br>numb hands                             | yes | yes | no  | no                                                                                         | no  | absent  | absent  | normal                                                                              | NA  | NA        |
| 41 | s18 | male   | 50 | 60 | unsteadiness,<br>slurred speech                         | yes | yes | yes | no                                                                                         | no  | absent  | absent  | normal                                                                              | yes | NA        |
| 42 | s19 | male   | 45 | 55 | unsteadiness in<br>the dark                             | yes | yes | yes | no                                                                                         | no  | absent  | reduced | normal                                                                              | yes | NA        |
| 43 | s20 | female | 50 | 65 | unsteadiness in<br>the dark                             | yes | yes | yes | no                                                                                         | yes | absent  | absent  | normal                                                                              | NA  | NA        |
| 44 | s21 | female | NA | 72 | NA                                                      | yes | yes | yes | no                                                                                         | no  | absent  | absent  | normal                                                                              | yes | NA        |
| 45 | s22 | female | 40 | 47 | unsteadiness                                            | yes | yes | no  | no                                                                                         | no  | absent  | absent  | normal                                                                              | NA  | NA        |
| 46 | s23 | female | 70 | 76 | unsteadiness                                            | yes | yes | no  | no                                                                                         | no  | absent  | absent  | normal                                                                              | yes | NA        |
| 47 | s24 | male   | 69 | 73 | unsteadiness<br>plodding/flatfooted,<br>speech problems | yes | yes | no  | no                                                                                         | no  | absent  | absent  | normal                                                                              | yes | NA        |
| 48 | s25 | male   | 35 | 40 | age 35                                                  | yes | yes | no  | no                                                                                         | yes | absent  | absent  | normal                                                                              | yes | NA        |
| 49 | s26 | female | 35 | 38 | unsteadiness,                                           | yes | yes | no  | no                                                                                         | yes | reduced | absent  | reduced in the                                                                      | yes | NA        |

|    |     |        |    |    |                                                                               |     |     |     |                                                                         |     |        |        |                               |     |    |
|----|-----|--------|----|----|-------------------------------------------------------------------------------|-----|-----|-----|-------------------------------------------------------------------------|-----|--------|--------|-------------------------------|-----|----|
| 50 | s27 | female | 53 | 54 | vertigo and speech<br>also early<br>oscillopsia,<br>unsteadiness,<br>numbness | yes | yes | no  | no                                                                      | no  | absent | absent | normal                        | yes | NA |
| 51 | s28 | female | 60 | 67 | unsteadiness<br>unsteadiness,<br>dysarthria,<br>numbness                      | yes | yes | no  | no                                                                      | no  | absent | absent | reduced in the<br>lower limbs | NA  |    |
| 52 | s29 | male   | 54 | 64 | unsteadiness                                                                  | yes | yes | no  | Yes (constipation,<br>xerophthalmia)                                    | no  | absent | absent | normal                        | yes | NA |
| 53 | s30 | female | 65 | 73 | unsteadiness                                                                  | yes | yes | no  | no                                                                      | no  | absent | absent | normal                        | NA  | NA |
| 54 | s31 | female | 58 | 61 | unsteadiness                                                                  | yes | yes | no  | no                                                                      | no  | NA     | NA     | NA                            | NA  | NA |
| 55 | s32 | female | 50 | 64 | unsteadiness in<br>the dark, numb<br>hands                                    | yes | yes | yes | Yes (abnormal blood<br>pressure control,<br>abnormal bowel<br>motility) | no  | absent | absent | normal                        | yes | NA |
| 56 | s33 | male   | 48 | 51 | unsteadiness in<br>the dark, pain                                             | yes | no  | no  | no                                                                      | yes | absent | absent | normal                        | no  | NA |

cMAP: compound motor action potential; LL lower limbs; SAP:sensory action potentials, UL upper limbs,

**SUPPLEMENTAL TABLE 3. Primers sequences and thermocycling conditions**

|                                            | <b>Primers</b>                                                                                                                                                                                                                                                                                                                                                                                                                                                                        | <b>Reagents</b>                                                                                                                                                       | <b>Thermocycling conditions</b>                                                                                                                                           |
|--------------------------------------------|---------------------------------------------------------------------------------------------------------------------------------------------------------------------------------------------------------------------------------------------------------------------------------------------------------------------------------------------------------------------------------------------------------------------------------------------------------------------------------------|-----------------------------------------------------------------------------------------------------------------------------------------------------------------------|---------------------------------------------------------------------------------------------------------------------------------------------------------------------------|
| <b>Probe generation</b>                    | Fw: ATTAGGTGTCTGGTGAGGGC<br>Rv: GAAGAATGGCCCCAAAAGCA                                                                                                                                                                                                                                                                                                                                                                                                                                  | Faststart Master Mix 2X (Roche)<br>Probe synthesis mix 20x (Roche)<br>Primers 0.5 μM<br>Plasmid DNA 50 ng                                                             | 95°C 4 min<br><br>[95°C 30 s<br>63°C 30 s<br>72°C 60 s] x 35 cycles                                                                                                       |
| <b>Short-range flanking PCR</b>            | Fw: TCAAGTGATACTCCAGCTACACCGTTGC<br>Rv: GTGGGAGACAGGCCAATCACTTCAG                                                                                                                                                                                                                                                                                                                                                                                                                     | Faststart Master Mix 2X (Roche)<br>Primers 0.5 μM<br>gDNA 50 ng                                                                                                       | 72°C 5 min<br>95°C 4 min<br><br>[95°C 30 s<br>59°C 30 s<br>72°C 60 s] x 35 cycles                                                                                         |
| <b>Long-Range flanking PCR and cloning</b> | Fw TCAAGTGATACTCCAGCTACACCGTTGC<br>Rv GTGGGAGACAGGCCAATCACTTCAG                                                                                                                                                                                                                                                                                                                                                                                                                       | Phusion Flash High-Fidelity PCR Master Mix 2X (Thermo-Fisher)<br>Primers 0.5 μM<br>DMSO 3%<br>gDNA 50 ng                                                              | 72°C 5 min<br>98°C 3 min<br><br>[98°C 10 s<br>65°C 15 s - Each cycle decreasing by 0.5°C<br>72°C 3 min] X18 cycles<br><br>[98°C 10s<br>57°C 15s<br>72°C 3 min] X18 cycles |
| <b>Repeat-primed PCR</b>                   | Fw FAM-TCAAGTGATACTCCAGCTACACCGT<br>Anchor CAGGAAACAGCTATGACC<br><br><b>(AAAAG)<sub>11</sub> allele</b><br>Rv1<br>CAGGAAACAGCTATGACCAACAGAGCAAGACTCTGT<br>TTCAAAAAGAAAAGAAAAGAAAAGAAAA<br>Rv2<br>CAGGAAACAGCTATGACCAACAGAGCAAGACTCTGT<br>TTCAAAAAGAAAAGAAAAGAAAAGAAAA<br>Rv3<br>CAGGAAACAGCTATGACCAACAGAGCAAGACTCTGT<br>TTCAAAAAGAAAAGAAAAGAAAAGAAAA<br><br><b>(AAAGG)<sub>exp</sub> allele</b><br>Rv1<br>CAGGAAACAGCTATGACCAACAGAGCAAGACTCTGT<br>TTCAAAAAGGAAAGGAAAGGAAAGGAAA<br>Rv2 | Phusion Flash High-Fidelity PCR Master Mix 2X (Thermo-Fisher)<br>Fw Primer 0.5 μM<br>Anchor 0.5 μM<br>Rv primers (Rv1:Rv2:Rv3=1:1:1) 0.05 μM<br>DMSO 3%<br>gDNA 50 ng | 72°C 5 min<br>98°C 3 min<br><br>[98°C 10s<br>65°C 15s<br>72°C 60s] x35 cycles<br><br>72°C 5 min                                                                           |



|                                                        |                                                                                                                                                                                                                                                                                                                                                                                                                                                                                      |                                                                                         |                                                                                                                                                                                                                                                               |
|--------------------------------------------------------|--------------------------------------------------------------------------------------------------------------------------------------------------------------------------------------------------------------------------------------------------------------------------------------------------------------------------------------------------------------------------------------------------------------------------------------------------------------------------------------|-----------------------------------------------------------------------------------------|---------------------------------------------------------------------------------------------------------------------------------------------------------------------------------------------------------------------------------------------------------------|
|                                                        | <p>CAGGAAACAGCTATGACCAACAGAGCAAGACTCTGT<br/> TTCAAAAAGGAAAGGAAAGGAAAGGAAA</p> <p>Rv3<br/> CAGGAAACAGCTATGACCAACAGAGCAAGACTCTGT<br/> TTCAAAAAGGAAAGGAAAGGAAAGGAAA</p> <p><b>(AAGGG)<sub>exp</sub> allele</b></p> <p>Rv1<br/> CAGGAAACAGCTATGACCAACAGAGCAAGACTCTGT<br/> TTCAAAAAGGGAAGGGAAGGGAAGGGAA</p> <p>Rv2<br/> CAGGAAACAGCTATGACCAACAGAGCAAGACTCTGT<br/> TTCAAAAAGGGAAGGGAAGGGAAGGGAA</p> <p>Rv3<br/> CAGGAAACAGCTATGACCAACAGAGCAAGACTCTGT<br/> TTCAAAAAGGGAAGGGAAGGGAAGGGAA</p> |                                                                                         |                                                                                                                                                                                                                                                               |
| <b>qRT-PCR</b>                                         | <p><b>cF1</b> (Fw) CATTCCGAAATTCTTTGGAGTA<br/> <b>cR1</b> (Rw) CGGGAGCTATTTACCTTGAT<br/> <b>cF2</b> (Fw) GGCAGTTGCATGAAGATGAAG<br/> <b>cR2</b> (Rv) CCTTTCGAGCCTTTTTGGTC<br/> <b>iR1</b> (Rv) TCAATGCAAAATTATACCCAGA</p>                                                                                                                                                                                                                                                             | <p>SYBR™ Green PCR Master Mix<br/> 2x<br/> Primers 0.4 μM<br/> cDNA from 500 ng RNA</p> | <p>95°C 10 min<br/> [95°C 15s<br/> 60°C 60s]x 40 cycles</p>                                                                                                                                                                                                   |
| <b>rs11096992<br/>and<br/>rs2066790<br/>genotyping</b> | <p><b>rs11096992</b><br/> Fw/sequencing TGGCTTAAATGATCTTTTCCCG<br/> Rv CACCAATAAACTTACACCCACA</p> <p><b>rs2066790</b><br/> Fw CCTGAGGTGTGTGGCTTTAG<br/> Rv/sequencing TCAGGACTTACAGACTTTGGGA</p>                                                                                                                                                                                                                                                                                     | <p>Faststart Master Mix 2X (Roche)<br/> Primers 0.5 μM<br/> gDNA 50 ng</p>              | <p>95°C 4 min<br/> [95°C 30 s<br/> 65°C 30 s -<br/> 72°C 45 s] X8 cycles</p> <p>95°C 30 s<br/> 65°C 30 s - Each cycle<br/> decreasing by 0.5°C<br/> 72°C 45 s] X16 cycles</p> <p>[95°C 30 s<br/> 55°C 30 s -<br/> 72°C 45 s] X16 cycles</p> <p>72°C 5 min</p> |

PCR: polymerase chain reaction; qRT-PCR quantitative real-time PCR; Fw: forward; Rv: reverse, DMSO dimethyl sulfoxide; gDNA genomic DNA
